# Supplementary material for: <strong>Strengthening the Practical Application of Experiments Assessing Maize Drought Tolerance</strong>
Source: Preprints.org preprint supplement (doi:10.20944/preprints202004.0083.v1), 2020-04-07
Supplement: Supplementary file 1 [file supplementary]

**Supplementary Table 1 | A summary of representative researches on drought-tolerance in maize**

| <b>Purpose</b>                              | <b>Treatment methods</b>                                                                            | <b>Treatment period</b>                                            | <b>Maize materials</b>                                                                               | <b>Selection criteria</b>                                                                                                                                                                                                                                            | <b>References</b>                                                                                            |
|---------------------------------------------|-----------------------------------------------------------------------------------------------------|--------------------------------------------------------------------|------------------------------------------------------------------------------------------------------|----------------------------------------------------------------------------------------------------------------------------------------------------------------------------------------------------------------------------------------------------------------------|--------------------------------------------------------------------------------------------------------------|
| Identifying drought-tolerance varieties     | Greenhouse: withholding water for 17 days and recovering for five days                              | 8-leaf stage                                                       | Nine inbred lines and one hybrid line                                                                | Drought resistance, recovery and adaptability                                                                                                                                                                                                                        | Chen et al., 2016                                                                                            |
|                                             | Greenhouse and field: withholding soil water content of the soil at 15%–16% for 16 days             | 10-leaf stage                                                      | Drought-tolerance transgenic lines (TsVP and betA) and their wild-type; hybrid line of TsVP and betA | Several agronomic traits, e.g., anthesis-silking interval, yield                                                                                                                                                                                                     | Wei et al., 2011                                                                                             |
| Exploring new drought-tolerance indicators  | Greenhouse: withholding water until measure;<br>Field: using rainout shelters and withholding water | Greenhouse: 5-day old seedlings;<br>Field: 35-40-day old seedlings | Recombinant inbred lines                                                                             | Large root cortical cells, small file number of cortical cells, and few but long lateral roots were related high yields. Other priority traits included rooting depth, acquisition of deep soil water, plant water status, leaf photosynthesis, and growth rate etc. | Chimungu et al., 2014a;<br>Chimungu et al., 2014b;<br>Zhan et al., 2015                                      |
|                                             | Greenhouse: without additional watering until the 4 <sup>th</sup> leaf was fully expanded           | 4-leaf stage                                                       | Inbred lines and hybrids, differing in drought tolerance                                             | The agronomic traits related to drought resistance were analyzed, e.g., leaf elongation rate, leaf width                                                                                                                                                             | Avramova et al., 2016                                                                                        |
|                                             | Field: withholding irrigation 2-4 weeks                                                             | One month after sowing                                             | Hybrids                                                                                              | Hybrids with lower kernel $\Delta^{18}\text{O}$ under well-watered and intermediate water stress had higher yields                                                                                                                                                   | Cabrera-Bosquet et al., 2009                                                                                 |
| Screening drought-related molecular markers | Field: withholding irrigation before anthesis                                                       | Flowering stage                                                    | Inbred lines                                                                                         | Molecular markers related to agronomic traits, e.g., plant height, leaf senescence, chlorophyll content, root capacitance, yield                                                                                                                                     | Messmer et al., 2009; Almeida et al., 2014; Thirunavukkarasu et al., 2014; Xu et al., 2014; Li et al., 2016; |
|                                             |                                                                                                     |                                                                    | Inbred lines and their offspring from crossing with a common inbred line                             | Molecular markers related to metabolic and physiological traits (e.g., abscisic acid, proline, total sugar, dry mass, leaf weight) and field traits (e.g., grain yield, anthesis-silking interval)                                                                   | Xue et al., 2013;<br>Zhang et al., 2016                                                                      |

## References

- Almeida, G. D., Nair, S., Borém, A., Cairns, J., Trachsel, S., Ribaut, J. M., et al. (2014). Molecular mapping across three populations reveals a QTL hotspot region on chromosome 3 for secondary traits associated with drought tolerance in tropical maize. *Mol. Breed.* 34, 701-715. doi: 10.1007/s11032-014-0068-5
- Avramova, V., Nagel, K. A., Abdelgawad, H., Bustos, D., DuPlessis, M., Fiorani, F., et al. (2016). Screening for drought tolerance of maize hybrids by multi-scale analysis of root and shoot traits at the seedling stage. *J. Exp. Bot.* 67, 2453-2466. doi: 10.1093/jxb/erw055
- Cabrera-Bosquet, L., Sanchez, C., and Araus, J. L. (2009). Oxygen isotope enrichment ( $\Delta^{18}\text{O}$ ) reflects yield potential and drought resistance in maize. *Plant Cell Environ.* 32, 1487-1499. doi: 10.1111/j.1365-3040.2009.02013.x
- Chen, D., Wang, S., Cao, B., Cao, D., Leng, G., Li, H., et al. (2015). Genotypic variation in growth and physiological response to drought stress and re-watering reveals the critical role of recovery in drought adaptation in maize seedlings. *Front. Plant Sci.* 6: 1241. doi: 10.3389/fpls.2015.01241
- Chimungu, J. G., Brown, K. M., and Lynch, J. P. (2014a). Large root cortical cell size improves drought tolerance in maize. *Plant Physiol.* 166, 2166-2178. doi: 10.1104/pp.114.250449
- Chimungu, J. G., Brown, K. M., and Lynch, J. P. (2014b). Reduced root cortical cell file number improves drought tolerance in maize. *Plant Physiol.* 166, 1943-1955. doi: 10.1104/pp.114.249037
- Li, C., Sun, B., Li, Y., Liu, C., Wu, X., Zhang, D., et al. (2016). Numerous genetic loci identified for drought tolerance in the maize nested association mapping populations. *BMC Genomics* 17:894. doi: 10.1186/s12864-016-3170-8
- Messmer, R., Fracheboud, Y., Bänziger, M., Vargas, M., Stamp, P., and Ribaut J. M. (2009). Drought stress and tropical maize: QTL-by-environment interactions and stability of QTLs across environments for yield components and secondary traits. *Theor. Appl. Genet.* 119, 913-930. doi: 10.1007/s00122-009-1099-x
- Thirunavukkarasu, N., Hossain, F., Arora, K., Sharma, R., Shiriga, K., Mittal, S., et al. (2014). Functional mechanisms of drought tolerance in subtropical maize (*Zea mays*, L.) identified using genome-wide association mapping. *BMC genomics* 15:1182. doi: 10.1186/1471-2164-15-1182
- Wei, A., He, C., Li, B., Li, N., and Zhang, J. (2011). The pyramid of transgenes TsVP and BetA effectively enhances the drought tolerance of maize plants. *Plant Biotechnol. J.* 9, 216-229. doi: 10.1111/j.1467-7652.2010.00548.x
- Xu, J., Yuan, Y., Xu, Y., Zhang, G., Guo, X., Wu, F., et al. (2014). Identification of candidate genes for drought tolerance by whole-genome resequencing in maize. *BMC Plant Biol.* 14:83. doi: 10.1186/1471-2229-14-83
- Xue, Y., Warburton, M. L., Sawkins, M., Zhang, X., Setter, T., Xu, Y., et al. (2013). Genome-wide association analysis for nine agronomic traits in maize under well-watered and water-stressed conditions. *Theor. Appl. Genet.* 126, 2587-2596. doi: 10.1007/s00122-013-2158-x
- Zhan, A., Schneider, H., and Lynch, J. P. (2015). Reduced lateral root branching density improves drought tolerance in maize. *Plant Physiol.* 168, 1603-1615. doi: 10.1104/pp.15.00187
- Zhang, X., Warburton, M. L., Setter, T., Liu, H., Xue, Y., Yang, N., et al. (2016). Genome-wide association studies of drought-related metabolic changes in maize using an enlarged SNP panel. *Theor. Appl. Genet.* 129, 1449-1463. doi: 10.1007/s00122-016-2716-0
